# Supplementary material for: General Purpose Optimization Library (GPOL): A Flexible and Efficient Multi-Purpose Optimization Library in Python
Source: MDPI journal article supplement (doi:10.3390/app11114774), 2021-05-23
Supplement: s1 [file s1]

Archive with 1 entries (1 files):
- supplementary.pdf
